# Supplementary material for: How Do You #relax When You’re #stressed? A Content Analysis and Infodemiology Study of Stress-Related Tweets
Source: JMIR Public Health Surveill. 2017 Jun 13;3(2):e35. doi: 10.2196/publichealth.5939 (PMC5487742; doi:10.2196/publichealth.5939)
Supplement: Multimedia Appendix 1 [file publichealth_v3i2e35_app1.pdf]

**Appendix 1.** Examples of first-hand experience stress tweets with its themes. Sub-categories of themes are separated by a colon.

Note that all tweets have been paraphrased to preserve user anonymity.

### **Stress: Symptom: Psychological & Emotional**

#### **Examples:**

No idea what to do..., #stressed #worried #lost #frustrated  
#Broken, #Dejected, #Stressed, #Depressed.

How do I deal with all this. #StressinOut

Fell asleep. Had nightmare. woke up stressed, and somehow my cat bit me. Can things go  
right for me just once?

### **Stress: Symptom: Behavioral**

#### **Examples:**

I need a drink tonight. #sostressed

I'm soooo stressed...I think I might go on an chocolate binge.

im so stressed. started smoking again. hadnt done it in a very long time

Haven't been able to sleep past 9 AM for the past 2 weeks and getting told to do things is just  
too stressful..

### **Stress: Symptom: Physical**

#### **Examples:**

Chest hurts all nighttt #stressing

You get sick and are bedridden for only a few hours but because of the massive workload, you  
pretty much need to be dead. #stress

Feeling sick and soo stressed from school. Waiting for the weekend to lift my spirits.

Right now, Im shaking and my heart is beating so fast I can't even think! I am broken! Only  
God can heal me! #stressing

### **Stress: Symptom: Work**

#### **Examples:**

This job will kill me! #stress #nosleep

I'm annoyed with my job.. no vacation.. instead i have extra hours and a store without a  
manager #stressingOut

This is the first time I've cried for a long time, and all because of work. #sostressed

I'm not enjoying work much, to much stress!

### **Stress: Topic: Education**

#### **Examples:**

I just wanna finish my homework and go to sleep. This week is going to be horrible  
#StressingOut

|                       |
|-----------------------|
| College is #Stressful |
|-----------------------|

|                                                                 |
|-----------------------------------------------------------------|
| Not doing a math course online again #sostressful #whatsgoingon |
|-----------------------------------------------------------------|

|                                                      |
|------------------------------------------------------|
| How can my exam be in less than a month?! #stressing |
|------------------------------------------------------|

### **Stress: Topic: Finances**

#### **Examples:**

|                                                              |
|--------------------------------------------------------------|
| I cannot wait till I get a decent pay check again #stressing |
|--------------------------------------------------------------|

|                                                            |
|------------------------------------------------------------|
| I don't know how I'm gonna afford everything #stressingout |
|------------------------------------------------------------|

|                                                 |
|-------------------------------------------------|
| Why do you need to pay for class? #stressingout |
|-------------------------------------------------|

|                                               |
|-----------------------------------------------|
| I'm really tired of being broke!!!! #Stressed |
|-----------------------------------------------|

### **Stress: Topic: Relationships & Social**

#### **Examples:**

|                                                     |
|-----------------------------------------------------|
| Ain't nobody here for me but my kids. #stressingout |
|-----------------------------------------------------|

|                                                  |
|--------------------------------------------------|
| My husband going to trial tommorow #Stressingout |
|--------------------------------------------------|

|                                                                                                              |
|--------------------------------------------------------------------------------------------------------------|
| Omg my parents are being horrible. i hate them. they put a lot of stress on me. I get blamed for everything. |
|--------------------------------------------------------------------------------------------------------------|

|                                                              |
|--------------------------------------------------------------|
| Freaking out when we don't know where mom is.. #stressingout |
|--------------------------------------------------------------|

### **Stress: Topic: Responsibilities & Time**

#### **Examples:**

|                                                      |
|------------------------------------------------------|
| Known for waiting until the last minute #SoStressful |
|------------------------------------------------------|

|                                                                       |
|-----------------------------------------------------------------------|
| So many things to do and not enough time to do it in... #StressingOut |
|-----------------------------------------------------------------------|

|                                                                  |
|------------------------------------------------------------------|
| Coaches said they want a decision Monday...just stressed now moe |
|------------------------------------------------------------------|

|                                                                                       |
|---------------------------------------------------------------------------------------|
| So much to do! thought summers were for chilin #stressingout #needtorelax #ahhhh #cry |
|---------------------------------------------------------------------------------------|

### **Stress: Topic: Travel**

#### **Examples:**

|                                              |
|----------------------------------------------|
| Don't like last minute packing. #sostressful |
|----------------------------------------------|

|                                                          |
|----------------------------------------------------------|
| is stressing, I have court today, but not enough gas, =( |
|----------------------------------------------------------|

|                                                           |
|-----------------------------------------------------------|
| why do I always feel so lost down here?? Stressing me out |
|-----------------------------------------------------------|

|                                                        |
|--------------------------------------------------------|
| I don't have enough gas – running out... #stressingout |
|--------------------------------------------------------|

### **Stress: Topic: Other**

#### **Examples:**

|                                                          |
|----------------------------------------------------------|
| When I was a kid, always wanted to be older #sostressful |
|----------------------------------------------------------|

|                                                                                  |
|----------------------------------------------------------------------------------|
| cleaned my apartment. I've been messy lately I hope things get better. #stressed |
|----------------------------------------------------------------------------------|

|                                                          |
|----------------------------------------------------------|
| Played this week for the 1 <sup>st</sup> time. #stressin |
|----------------------------------------------------------|

|                                            |
|--------------------------------------------|
| prom is stressing me...and its weeks away! |
|--------------------------------------------|

**Stress: Action: Negative****Examples:**

|                                                            |
|------------------------------------------------------------|
| I need some nicotine right now... #stressful               |
| I hope my herbal cigarettes arrive tomorrow, I'm stressed. |
| I need a drink tonight. #sostressed                        |
| Court in the morning – trying to drink away the stress     |

**Stress: Action: Positive****Examples:**

|                                                               |
|---------------------------------------------------------------|
| I need food, a sleep, and a hug. #stressingout #tired #hungry |
| Stressful day. #bath #relax                                   |
| I need to go for a run, getting stressed by this class        |
| smooth jazz is going to get me through the day. #sostressed   |

**Stress: None-specific****Examples:**

|                              |
|------------------------------|
| #stressed!!!                 |
| #Stressed about everything!! |
| Bad Night #SoStressed...     |
