# Supplementary material for: How Do You #relax When You’re #stressed? A Content Analysis and Infodemiology Study of Stress-Related Tweets
Source: JMIR Public Health Surveill. 2017 Jun 13;3(2):e35. doi: 10.2196/publichealth.5939 (PMC5487742; doi:10.2196/publichealth.5939)
Supplement: Multimedia Appendix 2 [file publichealth_v3i2e35_app2.pdf]

**Appendix 2.** Examples of first-hand experience relaxation tweets with its themes. Sub-categories of themes are separated by a colon.

**Relax: Physical**

**Examples:**

|                                                                         |
|-------------------------------------------------------------------------|
| off to spin class to get a good workout. just want to relax:D           |
| Yoga is my new thing #SoRelaxing                                        |
| My wake up routine is doing 50 crunches, and going for a run. #Relaxing |
| Awesome workout. I see a relaxing night ahead!                          |

**Relax: Water**

**Examples:**

|                                                          |
|----------------------------------------------------------|
| A bubble bath is wonderful after a bad day! #relaxed     |
| Mom's pool for down time and tanning! #relaxin #poolside |
| Thunderstrom #SoRelaxing when you're inside!             |
| Finally some #rain - weather cooled down #relaxed #cool  |

**Relax: Self-Care**

**Examples:**

|                                                                                                                                                         |
|---------------------------------------------------------------------------------------------------------------------------------------------------------|
| Take a relaxing night in the hot tub soon.                                                                                                              |
| What an amazing day! Going to have a massage. incredible weather! #luckygirl #sorelaxing<br><a href="http://t.co/EhhTB2Sdeo">http://t.co/EhhTB2Sdeo</a> |
| Just took a relaxing shower                                                                                                                             |
| Pedicures! #relaxing #happydays                                                                                                                         |

**Relax: Social**

**Examples:**

|                                                       |
|-------------------------------------------------------|
| Day off . #relaxing                                   |
| Drinks on a #Monday Lunch coming up #relaxin          |
| A relaxing, stress-free night. can't wait!            |
| just got home from work busy day,glad its over #relax |

**Relax: Alcohol & Drugs**

**Examples:**

|                                                                        |
|------------------------------------------------------------------------|
| morphine is great! #relaxin                                            |
| Enjoying a beer, relaxing.. I deserve it!                              |
| Off work! I just wanna relax...                                        |
| All you gotta do is put a #drinkinmyhand and I'm a happy person #relax |

**Relax: Entertainment & Hobbies**

**Examples:**

|                                                   |
|---------------------------------------------------|
| I'm gonna do laundry, go in the shower, and relax |
| #Relaxin doing what they do best                  |
| Smoking hookah and watching tV. #SoRelaxing       |
| Best way to enjoy my day off. #Relaxing           |

## **Relax: Food & Drink**

### **Examples:**

|                                                                                              |
|----------------------------------------------------------------------------------------------|
| Yesterday: Had a nice #bbq with #friends. We #relaxed, and had #fun.                         |
| drinking coffee and generally just relaxing until class begins                               |
| raisin bagel, painted nails, city and colour playing and the moon is right outside my window |
| #relaxing                                                                                    |
| home after a long day, going to have a cup of tea and relax, good night all                  |

## **Relax: Nature**

### **Examples:**

|                                                 |
|-------------------------------------------------|
| Day off at the beach #relaxin                   |
| Sitting here watching the rain #relaxed         |
| I love the rain, helps me relax... I'm so tired |
| #moodchanger #relaxin #coolin                   |

## **Relax: Rest & Vacation**

### **Examples:**

|                                                                                       |
|---------------------------------------------------------------------------------------|
| relaxing and looking at the sunset. Thank goodness for life and being able to breath. |
| #beach #summer #vacation #sunnyday #smile #loveit #relaxed                            |
| It's one of those days. #vacation #relaxed                                            |
| The conference was amazing! Taking a day off to relax                                 |

## **Relax: Other**

### **Examples:**

|                                                    |
|----------------------------------------------------|
| Been sitting in my bed for an hour #sorelaxing     |
| sometimes I like to just close my eyes...and relax |
| Bored #selfie #relaxin #lifestyle ...              |

## **Relax: None-specific**

### **Examples:**

|                      |
|----------------------|
| Relaxing             |
| #relaxin             |
| now I wait and relax |
| just relaxin now too |
