# Supplementary material for: How Do You #relax When You’re #stressed? A Content Analysis and Infodemiology Study of Stress-Related Tweets
Source: PubMed Central journal article supplement (PMC5487742; doi:10.2196/publichealth.5939), 2017-06-13
Supplement: publichealth_v3i2e35_app3.pdf [file publichealth_v3i2e35_app3.pdf]

### Appendix 3.

**Appendix 3a.** Number of classified first-hand stress tweets by theme in each city, the first-hand stress tweets are classified using the SVM classifier.

| City          | Action_Neg | Action_Pos | S_Behavioral | S_Physical | S_PsychEmotional |
|---------------|------------|------------|--------------|------------|------------------|
| Los Angeles   | 39         | 199        | 222          | 82         | 192              |
| New York      | 62         | 304        | 311          | 100        | 248              |
| San Diego     | 19         | 96         | 128          | 50         | 98               |
| San Francisco | 18         | 137        | 126          | 56         | 114              |

| City          | T_Finances | T_Others | T_Education | T_Temporal_Resp | T_Travel | T_Work |
|---------------|------------|----------|-------------|-----------------|----------|--------|
| Los Angeles   | 22         | 255      | 322         | 71              | 98       | 115    |
| New York      | 37         | 322      | 383         | 88              | 117      | 172    |
| San Diego     | 12         | 146      | 166         | 39              | 45       | 43     |
| San Francisco | 15         | 148      | 191         | 47              | 49       | 69     |

**Appendix 3b.** Number of classified first-hand relaxation tweets in each city, the first-hand relaxation tweets are classified using the SVM classifier.

| City          | AlcoholDrugs | Ent_Hobbies | FoodDrink | Nature |
|---------------|--------------|-------------|-----------|--------|
| Los Angeles   | 98           | 368         | 262       | 269    |
| New York      | 149          | 518         | 332       | 244    |
| San Diego     | 65           | 173         | 127       | 130    |
| San Francisco | 66           | 209         | 146       | 128    |

| City          | Others | Physical | Rest_Vaca | SelfCare | Water |
|---------------|--------|----------|-----------|----------|-------|
| Los Angeles   | 234    | 91       | 764       | 155      | 258   |
| New York      | 328    | 116      | 1153      | 212      | 219   |
| San Diego     | 109    | 35       | 343       | 79       | 126   |
| San Francisco | 106    | 50       | 411       | 105      | 129   |
