# Supplementary material for: How Do You #relax When You’re #stressed? A Content Analysis and Infodemiology Study of Stress-Related Tweets
Source: PubMed Central journal article supplement (PMC5487742; doi:10.2196/publichealth.5939), 2017-06-13
Supplement: publichealth_v3i2e35_app4.pdf [file publichealth_v3i2e35_app4.pdf]

## Appendix 4

**Appendix 4a.** Top 30 highest frequency keywords in first-hand experience stress tweets for Los Angeles, New York, San Diego, and San Francisco.

| Stress category |      |       |           |      |       |           |      |       |               |      |       |
|-----------------|------|-------|-----------|------|-------|-----------|------|-------|---------------|------|-------|
| Los Angeles     |      |       | New York  |      |       | San Diego |      |       | San Francisco |      |       |
| i               | 2692 | 4%    | i         | 3604 | 4.10% | i         | 1216 | 3.90% | i             | 1626 | 4.10% |
| stress          | 2191 | 3.30% | stress    | 2873 | 3.20% | stress    | 968  | 3.10% | stress        | 1198 | 3%    |
| to              | 1739 | 2.60% | to        | 2332 | 2.60% | to        | 840  | 2.70% | to            | 1069 | 2.70% |
| the             | 1473 | 2.20% | the       | 2032 | 2.30% | the       | 696  | 2.20% | the           | 834  | 2.10% |
| out             | 1330 | 2%    | stressed  | 2020 | 2.30% | stressed  | 662  | 2.10% | stressed      | 804  | 2%    |
| stressed        | 1330 | 2%    | a         | 1687 | 1.90% | out       | 623  | 2%    | out           | 755  | 1.90% |
| my              | 1228 | 1.80% | my        | 1621 | 1.80% | is        | 611  | 2%    | my            | 746  | 1.90% |
| and             | 1185 | 1.80% | is        | 1576 | 1.80% | my        | 595  | 1.90% | and           | 741  | 1.90% |
| is              | 1144 | 1.70% | out       | 1447 | 1.60% | so        | 581  | 1.90% | is            | 678  | 1.70% |
| a               | 1136 | 1.70% | and       | 1444 | 1.60% | and       | 556  | 1.80% | a             | 657  | 1.70% |
| so              | 1072 | 1.60% | so        | 1381 | 1.60% | me        | 505  | 1.60% | so            | 632  | 1.60% |
| me              | 1031 | 1.50% | me        | 1243 | 1.40% | a         | 498  | 1.60% | me            | 607  | 1.50% |
| i'm             | 904  | 1.40% | this      | 1129 | 1.30% | i'm       | 459  | 1.50% | i'm           | 541  | 1.40% |
| stressful       | 870  | 1.30% | stressful | 1125 | 1.30% | stressful | 435  | 1.40% | stressful     | 497  | 1.30% |
| this            | 757  | 1.10% | i'm       | 1095 | 1.20% | this      | 384  | 1.20% | this          | 477  | 1.20% |
| stressing       | 655  | 1%    | of        | 833  | 0.90% | of        | 319  | 1%    | of            | 396  | 1%    |
| of              | 640  | 1%    | of        | 811  | 0.90% | stressing | 313  | 1%    | stressing     | 385  | 1%    |
| it              | 585  | 0.90% | for       | 752  | 0.80% | for       | 284  | 0.90% | it            | 357  | 0.90% |
| for             | 543  | 0.80% | it        | 749  | 0.80% | it        | 263  | 0.80% | for           | 325  | 0.80% |
| be              | 499  | 0.80% | be        | 738  | 0.80% | be        | 244  | 0.80% | just          | 299  | 0.80% |
| just            | 490  | 0.70% | that      | 661  | 0.70% | just      | 239  | 0.80% | be            | 295  | 0.70% |
| that            | 459  | 0.70% | in        | 638  | 0.70% | about     | 224  | 0.70% | about         | 280  | 0.70% |
| you             | 452  | 0.70% | just      | 630  | 0.70% | that      | 216  | 0.70% | in            | 272  | 0.70% |
| about           | 444  | 0.70% | you       | 551  | 0.60% | much      | 206  | 0.70% | that          | 267  | 0.70% |
| in              | 440  | 0.70% | about     | 535  | 0.60% | have      | 196  | 0.60% | you           | 249  | 0.60% |
| have            | 374  | 0.60% | have      | 497  | 0.60% | in        | 192  | 0.60% | have          | 220  | 0.60% |
| much            | 374  | 0.60% | not       | 494  | 0.60% | you       | 190  | 0.60% | not           | 214  | 0.50% |
| all             | 362  | 0.50% | all       | 490  | 0.60% | all       | 185  | 0.60% | all           | 213  | 0.50% |
| not             | 350  | 0.50% | much      | 485  | 0.50% | not       | 171  | 0.50% | much          | 212  | 0.50% |
| over            | 340  | 0.50% | don't     | 470  | 0.50% | but       | 161  | 0.50% | but           | 205  | 0.50% |

**Appendix 4b.** Top 30 highest frequency keywords in first-hand experience relaxation tweets for Los Angeles, New York, San Diego, and San Francisco.

| Relaxation category |      |       |          |      |       |           |     |       |               |     |       |
|---------------------|------|-------|----------|------|-------|-----------|-----|-------|---------------|-----|-------|
| Los Angeles         |      |       | New York |      |       | San Diego |     |       | San Francisco |     |       |
| relax               | 1571 | 3.80% | relax    | 2296 | 4.10% | relax     | 706 | 3.80% | relax         | 811 | 3.60% |
| to                  | 1397 | 3.40% | to       | 1794 | 3.20% | to        | 620 | 3.30% | to            | 768 | 3.40% |
| and                 | 1266 | 3.10% | and      | 1692 | 3%    | and       | 595 | 3.20% | and           | 758 | 3.40% |
| a                   | 1152 | 2.80% | relaxing | 1463 | 2.60% | relaxing  | 524 | 2.80% | a             | 585 | 2.60% |
| relaxing            | 1138 | 2.80% | the      | 1346 | 2.40% | the       | 489 | 2.60% | relaxing      | 585 | 2.60% |
| the                 | 1057 | 2.60% | a        | 1335 | 2.40% | a         | 466 | 2.50% | i             | 547 | 2.40% |
| i                   | 957  | 2.30% | i        | 1317 | 2.40% | i         | 405 | 2.20% | the           | 526 | 2.40% |
| t                   | 653  | 1.60% | my       | 817  | 1.50% | t         | 371 | 2%    | my            | 318 | 1.40% |
| co                  | 650  | 1.60% | just     | 714  | 1.30% | co        | 366 | 2%    | just          | 287 | 1.30% |
| http                | 644  | 1.60% | t        | 685  | 1.20% | http      | 361 | 1.90% | t             | 281 | 1.30% |
| just                | 565  | 1.40% | co       | 680  | 1.20% | my        | 248 | 1.30% | co            | 277 | 1.20% |
| my                  | 537  | 1.30% | http     | 672  | 1.20% | just      | 247 | 1.30% | http          | 275 | 1.20% |
| so                  | 418  | 1%    | so       | 538  | 1%    | so        | 185 | 1%    | in            | 228 | 1%    |
| time                | 412  | 1%    | with     | 537  | 1%    | in        | 184 | 1%    | so            | 214 | 1%    |
| in                  | 411  | 1%    | in       | 535  | 1%    | time      | 183 | 1%    | time          | 214 | 1%    |
| of                  | 389  | 0.90% | is       | 523  | 0.90% | is        | 171 | 0.90% | is            | 209 | 0.90% |
| with                | 377  | 0.90% | of       | 505  | 0.90% | at        | 161 | 0.90% | for           | 200 | 0.90% |
| is                  | 356  | 0.90% | time     | 467  | 0.80% | day       | 157 | 0.80% | of            | 198 | 0.90% |
| day                 | 341  | 0.80% | day      | 453  | 0.80% | of        | 156 | 0.80% | day           | 190 | 0.90% |
| for                 | 329  | 0.80% | for      | 432  | 0.80% | for       | 151 | 0.80% | with          | 182 | 0.80% |
| on                  | 308  | 0.80% | on       | 427  | 0.80% | with      | 146 | 0.80% | on            | 166 | 0.70% |
| at                  | 304  | 0.70% | home     | 424  | 0.80% | on        | 142 | 0.80% | at            | 159 | 0.70% |
| it                  | 250  | 0.60% | at       | 360  | 0.60% | it        | 115 | 0.60% | now           | 150 | 0.70% |
| it's                | 242  | 0.60% | work     | 355  | 0.60% | home      | 102 | 0.50% | it            | 147 | 0.70% |
| now                 | 232  | 0.60% | now      | 331  | 0.60% | it's      | 99  | 0.50% | home          | 127 | 0.60% |
| you                 | 219  | 0.50% | i'm      | 323  | 0.60% | me        | 97  | 0.50% | some          | 120 | 0.50% |
| this                | 218  | 0.50% | like     | 311  | 0.60% | this      | 94  | 0.50% | i'm           | 116 | 0.50% |
| home                | 207  | 0.50% | this     | 310  | 0.60% | you       | 94  | 0.50% | me            | 114 | 0.50% |
| me                  | 206  | 0.50% | me       | 292  | 0.50% | now       | 93  | 0.50% | it's          | 108 | 0.50% |
| i'm                 | 194  | 0.50% | back     | 285  | 0.50% | have      | 88  | 0.50% | you           | 104 | 0.50% |
